# Supplementary material for: Controllable interfacial electron transfer induced by heterointerfaced sulfur-based catalysts with less electronegative anions for boosted hydrogen evolution reaction in the universal pH range
Source: Royal Society of Chemistry journal article supplement (doi:10.1039/d2ta06240b), 2022-01-01
Supplement: d2ta06240b2.pdf [file d2ta06240b2.pdf]

## **Controllable Interfacial Electron Transfer Induced by Heterointerfaced Sulfur-based Catalysts with Lower Electronegative Anion for Boosted Hydrogen Evolution Reaction in Universal pH Range**

Dawei Chu <sup>a, b, ‡</sup>, Xiaoling Wei <sup>c, ‡</sup>, Xiumei Song <sup>d, f, ‡</sup>, Zhen Zhang <sup>e</sup>, Lichao Tan <sup>a, f, \*</sup>, Huiyuan Ma <sup>a, \*</sup>, Haijun Pang <sup>a</sup>, Xin Wang <sup>c, f</sup>, and Zhongwei Chen <sup>e, \*</sup>

<sup>a</sup> School of Materials Science and Chemical Engineering, Harbin University of Science and Technology, Harbin 150040, P. R. China

<sup>b</sup> Department of Materials Science and Engineering, National University of Singapore, Singapore 117574, Singapore

<sup>c</sup> South China Academy of Advanced Optoelectronics & International Academy of Optoelectronics at Zhaoqing, South China Normal University, Guangdong 510006, China

<sup>d</sup> State Key Laboratory of Urban Water Resource and Environment, School of Environment, Harbin Institute of Technology, Harbin, 150090, P. R. China

<sup>e</sup> Department of Chemical Engineering, University of Waterloo, Waterloo, ON N2L 3G1, Canada

<sup>f</sup> Carbon Neutral Research Institute, Zhejiang Wanli University, Ningbo 315100, P.R. China

E-mail: lctan@hrbust.edu.cn (L. Tan); mahy017@nenu.edu.cn (H. Ma);  
zhwchen@uwaterloo.ca (Z. Chen)

<sup>‡</sup> These authors contributed equally to this work.

## **1. Experimental section**

### **1.1 Chemicals**

All the chemical reagents; nickel nitrate hexahydrate ( $\text{Ni}(\text{NO}_3)_2 \cdot 6\text{H}_2\text{O}$ ) (Shanghai Dibo Chemicals Technology Co., Ltd.  $\geq 98.0\%$ ), Cobalt nitrate ( $\text{Co}(\text{NO}_3)_2 \cdot 6\text{H}_2\text{O}$ ) (Shanghai Aladdin Biochemical Technology Co., Ltd.  $99.0\%$ ), 2-methylimidazole (Shanghai Aladdin Biochemical Technology Co., Ltd.  $98.0\%$ ), Thioacetamide (TAA) ( $\text{CH}_3\text{CSNH}_2$ ) (Shanghai Aladdin Biochemical Technology Co., Ltd.  $\geq 99.0\%$ ) sodium hypophosphite ( $\text{NaH}_2\text{PO}_2 \cdot \text{H}_2\text{O}$ ) (Shanghai Aladdin Biochemical Technology Co., Ltd.  $\geq 99.0\%$ ), absolute ethanol (Tianli Chemical Reagent Co., Ltd.  $\geq 99.7\%$ ) and deionized (DI) water were analytical grades and used directly without further purification.

### **1.2 Preparation detail**

#### **1.2.1 Synthesis of Co-MOF/NF sample**

Co-MOF/NF sample was prepared using a dipping method. Firstly,  $\text{Co}(\text{NO}_3)_2 \cdot 6\text{H}_2\text{O}$  (0.29103 g) and 2-methylimidazole (1.3136 g) were dissolved separately into DI water (40 mL), then stirred for 30 min to obtain a uniform solution and then the two solutions were mixed up. After that, the NF was transferred into the mixed solution and maintained for 4 h in the air atmosphere. After the above operation, the Co-MOF/NF was collected, washed several times with DI water and dried at  $60\text{ }^\circ\text{C}$  for 24 h.

#### **1.2.2 Synthesis of NCL/NF sample**

The NCL/NF sample was synthesized with a condensation reflow method.  $\text{Ni}(\text{NO}_3)_2 \cdot 6\text{H}_2\text{O}$  (0.2 g) and Co-MOF/NF were initially dispersed into absolute ethanol (50 mL) and kept at  $100\text{ }^\circ\text{C}$  for 1 h. Then, the sample was cooled down to room temperature, rinsed with DI water several times and dried at  $60\text{ }^\circ\text{C}$  for 12 h.

#### **1.2.3 Synthesis of NCS-X/NF sample**

The NCS-X/NF sample was synthesized with a hydrothermal method. Typically, DI water (50 mL), NCL/NF and TAA were transferred into 100 mL Teflon-lined stainless-steel

autoclave, then kept at 160 °C for 4/6/10/14 h (The ratio of mass  $\text{NCL/NF - NF}$  and mass  $\text{TAA}$  is 1 : 4). After the autoclave was cooled down to room temperature, the sample was rinsed with DI water several times and dried at 60 °C for 12 h.

#### **1.2.4 Synthesis of $\text{V}_s\text{-NCSP-X/NF}$ sample**

The  $\text{NCS-X/NF}$  and  $\text{NaH}_2\text{PO}_2\cdot\text{H}_2\text{O}$  were charged in different porcelain boats of tube furnace (The ratio of mass  $\text{NCS-X/NF - NF}$  and mass  $\text{NaH}_2\text{PO}_2\cdot\text{H}_2\text{O}$  is 1 : 10). Before the heat treatment, nitrogen was introduced into the quartz tube at a flow rate of 200 sccm for 15 min to eliminate the remaining air. Then, the samples were subsequently calcined at 300 °C (with 5 °C/min heating rate) under nitrogen atmosphere for 2 h to form the  $\text{NCSP-X/NF}$  with S defects for electrode testing.

#### **1.2.5 Synthesis of $\text{V}_s\text{-CSP-X/NF}$ and $\text{CS-10/NF}$ sample**

The preparation process of  $\text{V}_s\text{-CSP-10/NF}$  is the same as  $\text{V}_s\text{-NCSP-10/NF}$  without additional  $\text{Ni}(\text{NO}_3)_2\cdot 6\text{H}_2\text{O}$ . The preparation process of  $\text{CS-10/NF}$  is similar to  $\text{NCS-10/NF}$  without the addition of  $\text{Ni}(\text{NO}_3)_2\cdot 6\text{H}_2\text{O}$ .

## **2. Materials characterization**

The structure of the fabricated products was investigated using a scanning electron microscope (FE-SEM) (Hitachi, SU8000) and a transmission electron microscope (TEM) (JEOL, JEM-2010, 200 kV). Electronic paramagnetic resonance (EPR) characterization was performed using the EPRA300-9.5/12 (Bruker) electron paramagnetic resonance spectrometer. The atomic force microscope (AFM) was performed using Park systems. Raman spectra were obtained using Thermo Fischer DXR 2Xi. X-ray diffraction (XRD) analysis was performed using a powder X-ray diffraction system (Rigaku, TTR-III) equipped with Cu K $\alpha$  radiation ( $\lambda = 0.15406$  nm) to determine crystalline structures of the obtained samples. The X-ray photoelectron spectroscopy (XPS) measurements were performed using a Thermo ESCALAB 250Xi spectrometer with monochromated Al K $\alpha$  radiation ( $h\nu = 1486.6$  eV). All XPS spectra were calibrated according to the C 1s peak at 284.6 eV.

### 3. Electrochemical measurement

The electrochemical measurements were implemented using the three-electrode system on an electrochemical workstation (CHI 760E). Graphite and Hg/HgO electrodes were served as the counter and reference electrodes, respectively. An electrode with the sample coated on NF was used as the working electrode. 1 M KOH, 0.5 M H<sub>2</sub>SO<sub>4</sub> and 1 M phosphate-buffered saline (PBS) were used as electrolytes. 1 M PBS was prepared by mixing 1 M KOH and KH<sub>2</sub>PO<sub>4</sub> (13.609 g, 100 mL DI water) solution until the pH value reached 7. The cyclic voltammetry (CV) curves were tested at a series of scan rates (5 mV/s, 10 mV/s, 20 mV/s, 40 mV/s, 60 mV/s, 80 mV/s, 100 mV/s). The iR-corrected linear sweep voltammetric (LSV) curves were tested at the scan rate of 5 mV/s. The Tafel slope is obtained by linearly fitting the points in the Tafel region of the LSV data. Electrochemical impedance spectroscopy (EIS) was tested from 100 kHz to 0.005 Hz. The amperometric current density-time (I-t) curves were measured at -10 mA cm<sup>-2</sup>. And the measured potential vs. Hg/HgO was calculated to a reversible hydrogen electrode (RHE) based on the equation ( $E_{\text{RHE}} = E_{\text{Hg/HgO}} + 0.0591 \times \text{pH} + 0.2415$ ).

## 4. Density functional theory calculations

### Computation detail

Modelling HER: For a quantitative description of the interactions between the catalysts and adsorbed H\*, the binding energy  $\Delta E_H$  was defined as follows:<sup>1</sup>

$$\Delta E_H = E_{(catalyst + H)} - E_{(catalyst)} - 1/2E_{(H_2)} \quad (1)$$

Where (catalyst + H) refers to hydrogen adsorbed on the catalyst surface, (catalyst) refers to a clean catalyst surface, and (H<sub>2</sub>) refers to hydrogen molecules. The hydrogen adsorption free energy was calculated at zero potential and pH=14 according to the reference.<sup>2</sup>

$$\Delta G_H = \Delta E_H + \Delta E_{ZPE} - T\Delta S + \Delta G_{pH} \quad (2)$$

Where  $\Delta E_H$  is the hydrogen adsorption energy,  $\Delta E_{ZPE}$  is the difference in zero-point energy,  $T$  is the temperature (300 K) and  $\Delta S$  is the entropy change. In the alkaline environment,  $\Delta G_{pH}$  should be considered and is the H<sup>+</sup> free energy correction by entropy:<sup>3</sup>

$$\Delta G_{pH} = -k_B T \ln[H^+] \quad (3)$$

### DFT calculation

The binding energy of NaO<sub>2</sub> to various substrates was calculated using the commercial Cambridge sequential total energy package program (CASTEP). Generalized gradient approximation with the Perdew-Burke-Ernzerh of functional was adopted for the total energy calculations. The ultrasoft pseudopotential was used to treat core electrons. The energy cutoff was set to 550 eV. The vacuum region between slabs is 20 Å. The Brillouin zone of the surface unit cell was sampled using Monkhorst-Pack grids, which were set as 4 × 4 × 1 for all surfaces and slabs.

## 5. Supporting figures

Figure S1

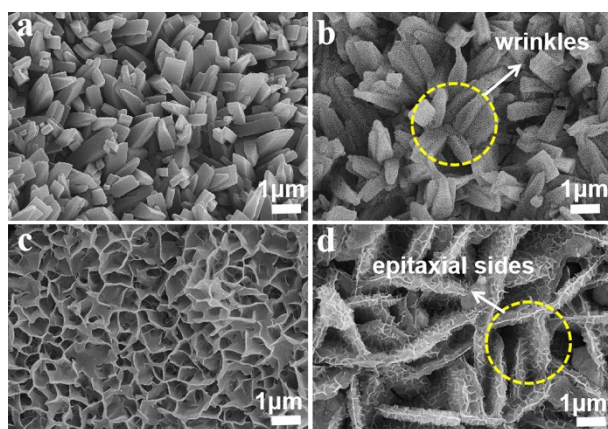

**Fig. S1.** SEM images of (a) Co-MOF/NF; (b) NCL/NF; (c) NCS-10/NF; (d)  $V_s$ -NCSP-10/NF.

**Figure S2**

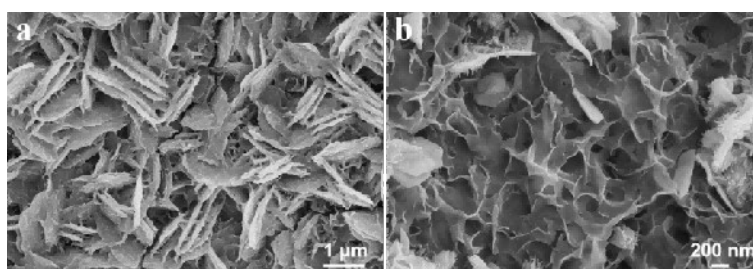

**Fig. S2.** SEM images of NCS-10/NF (a)  $M_{\text{NCL/NF}} : M_{\text{TAA}} = 1 : 2$ ; (b)  $M_{\text{NCL/NF}} : M_{\text{TAA}} = 1 : 6$ .  $M_{\text{NCL/NF}}$  devoted as the difference in mass between NCL grown on NF and pure NF;  $M_{\text{TAA}}$  devoted as the value in mass.



**Figure S3**

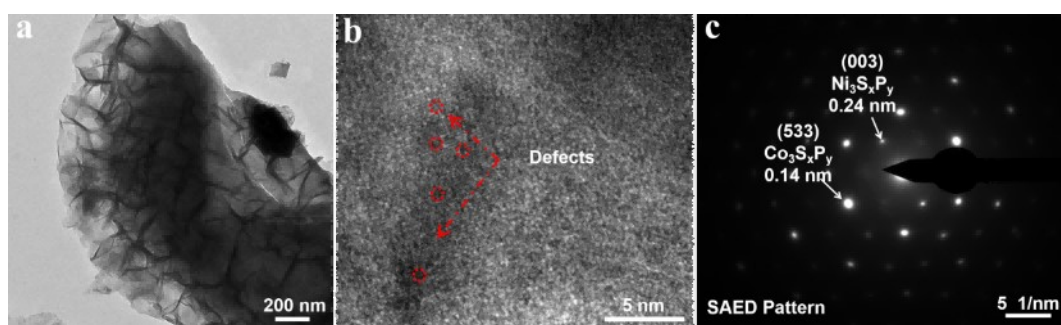

**Fig. S3.** TEM images of (a) V<sub>5</sub>-NCSP-10. (b) Marked defects image. (c) SAED Pattern.

**Figure S4**

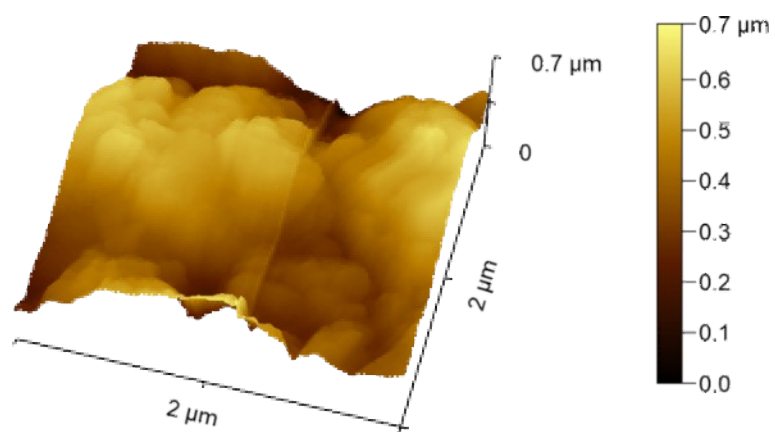

**Fig. S4.** AFM images of V<sub>5</sub>-NCSP-10 sample.

Figure S5

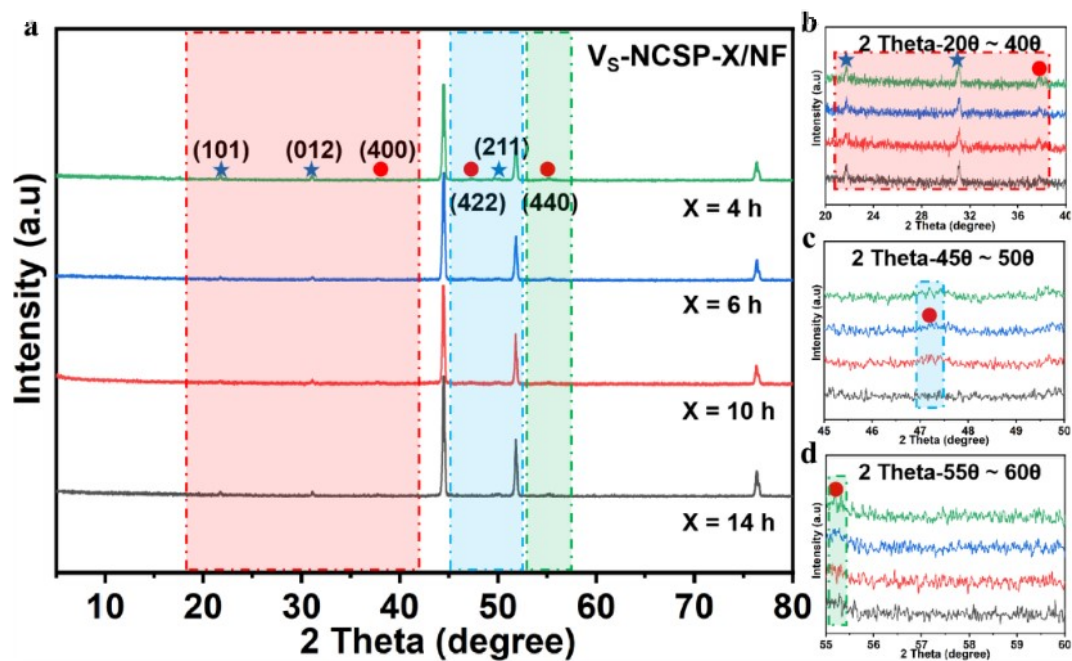

Fig. S5. XRD patterns of (a)  $V_5$ -NCSP-X/NF; Enlarged view of the part with different theta: (b) 200 - 400; (c) 450 - 500; (d) 550 - 600.

Figure S6

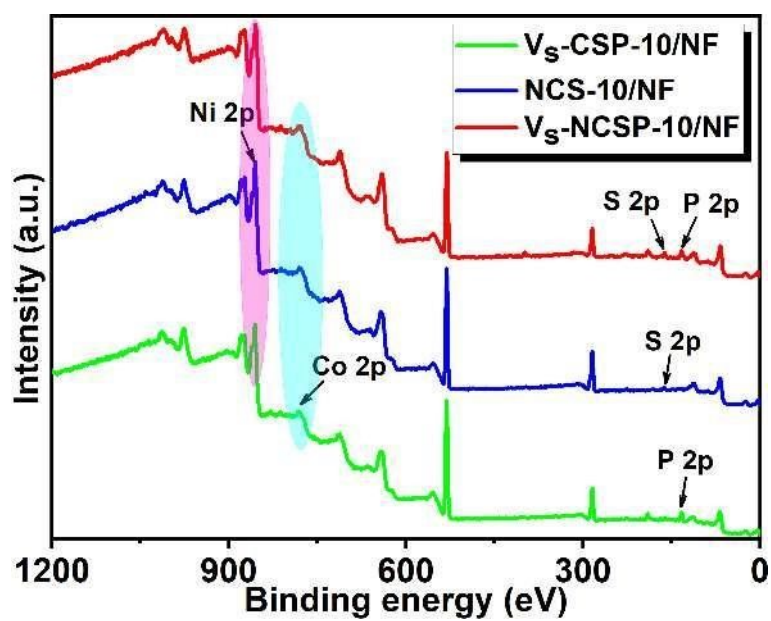

Fig. S6. Survey XPS spectra of the catalysts.

Figure S7

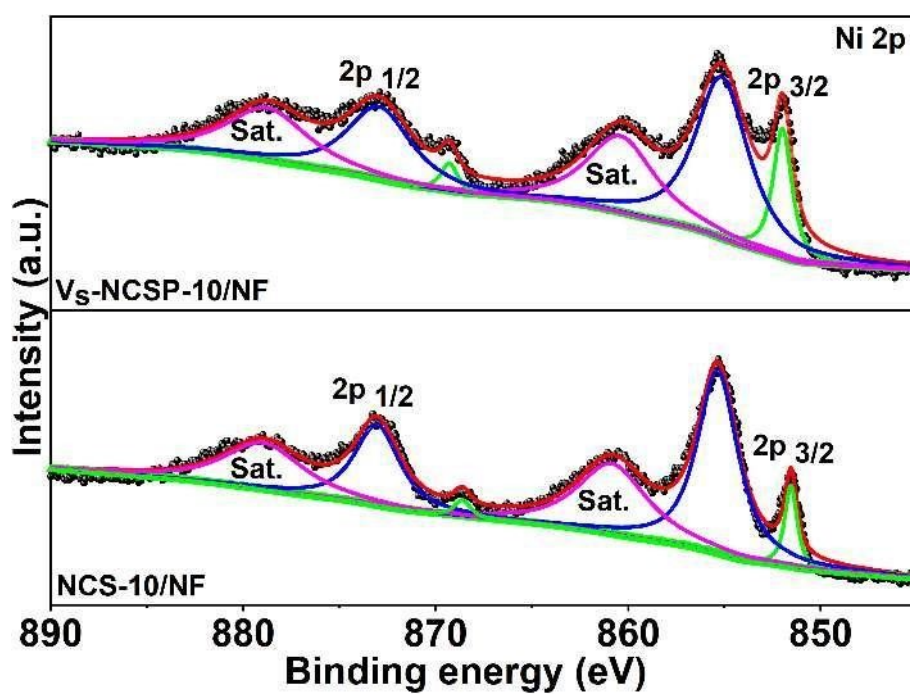

Fig. S7. Ni 2p XPS spectra of different catalysts.

Figure S8

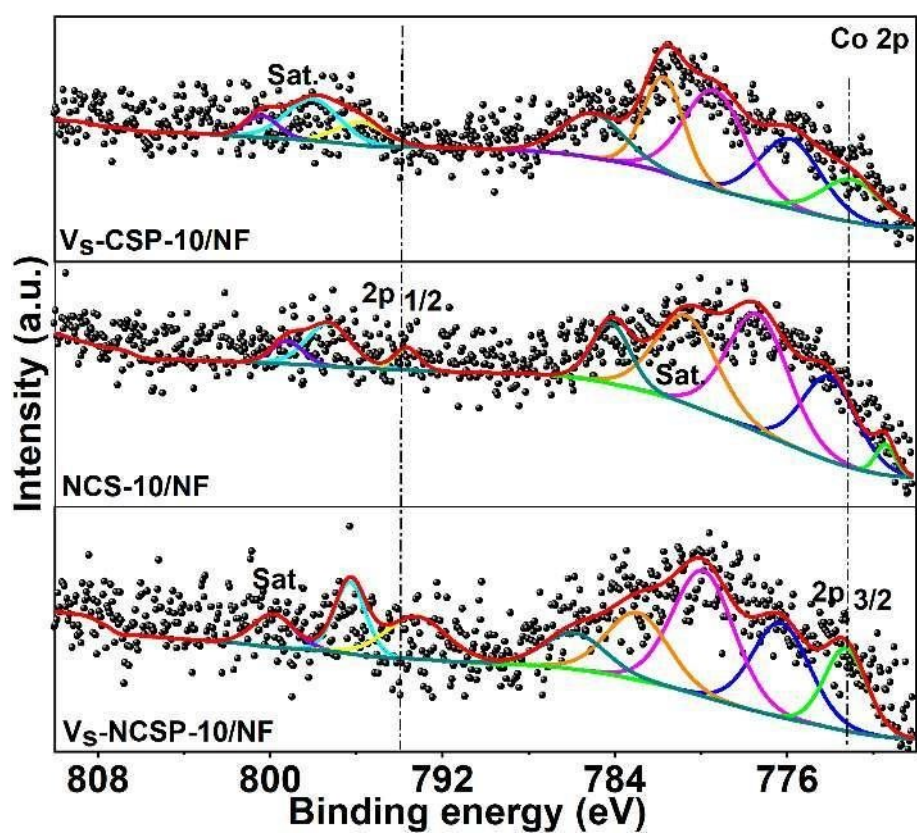

Fig. S8. Co 2p XPS spectra of different catalysts.

Figure S9

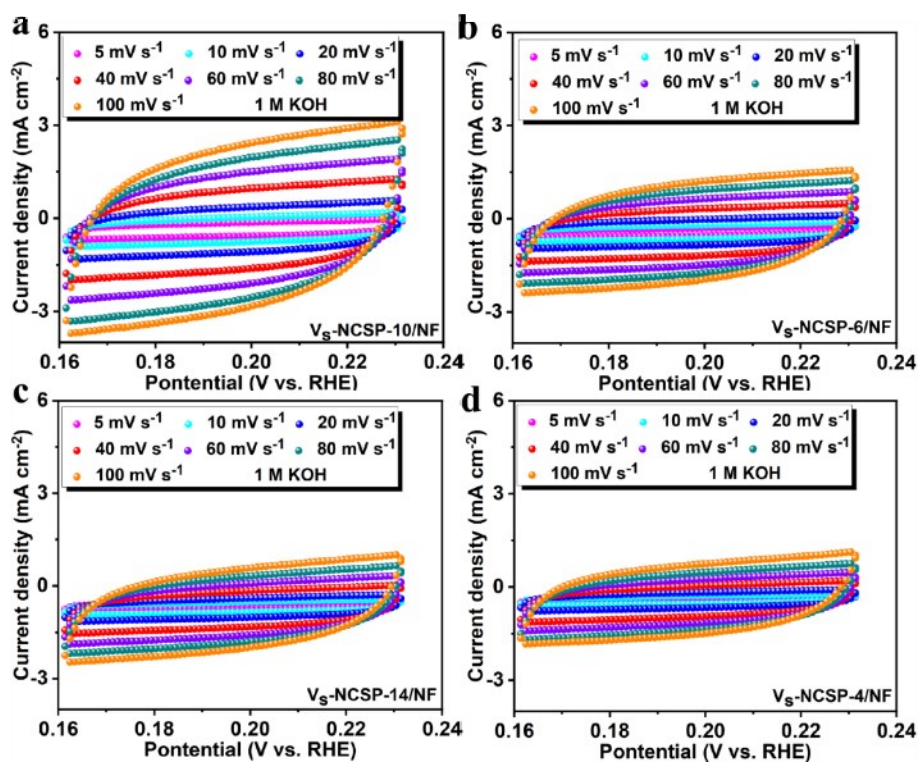

Fig. S9. The CV curves of  $V_s$ -NCSP-X/NF: (a-d) in 1 M KOH.

Figure S10

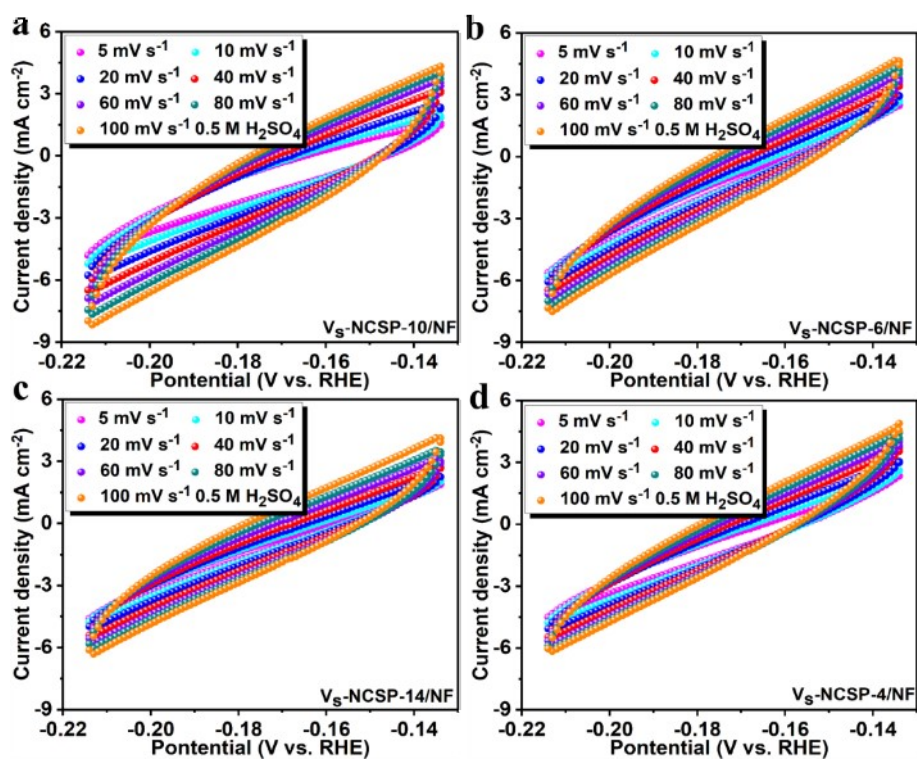

Fig. S10. The CV curves of  $V_s$ -NCSP-X/NF: (a-d) in 0.5 M  $H_2SO_4$ .



Figure S11

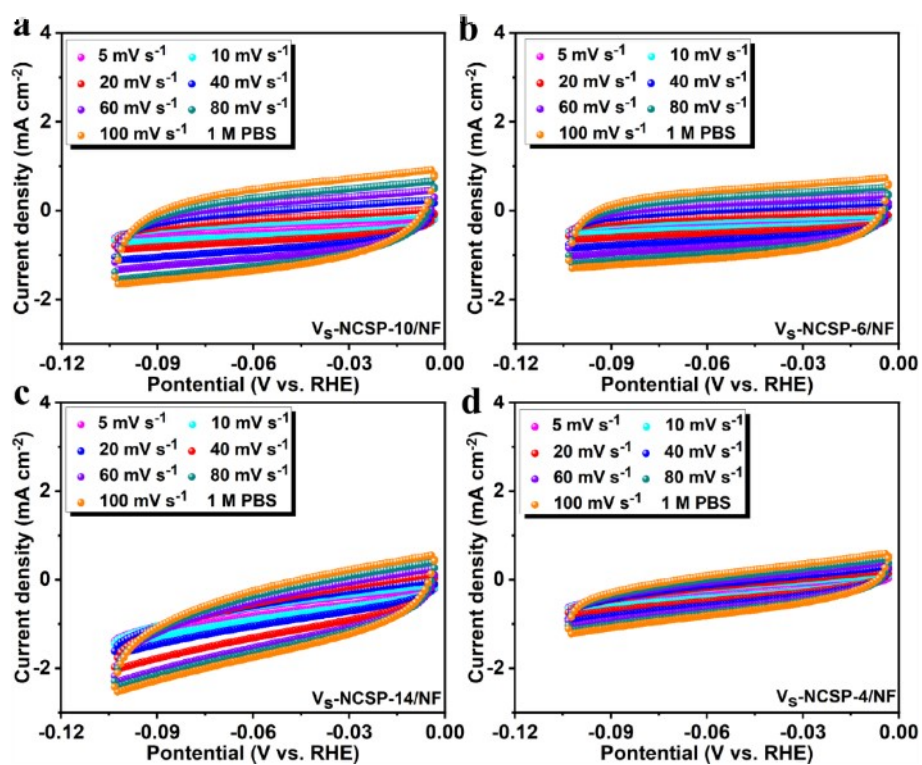

Fig. S11. The CV curves of  $V_s$ -NCSP-X/NF: (a-d) in 1 M PBS.

Figure S12

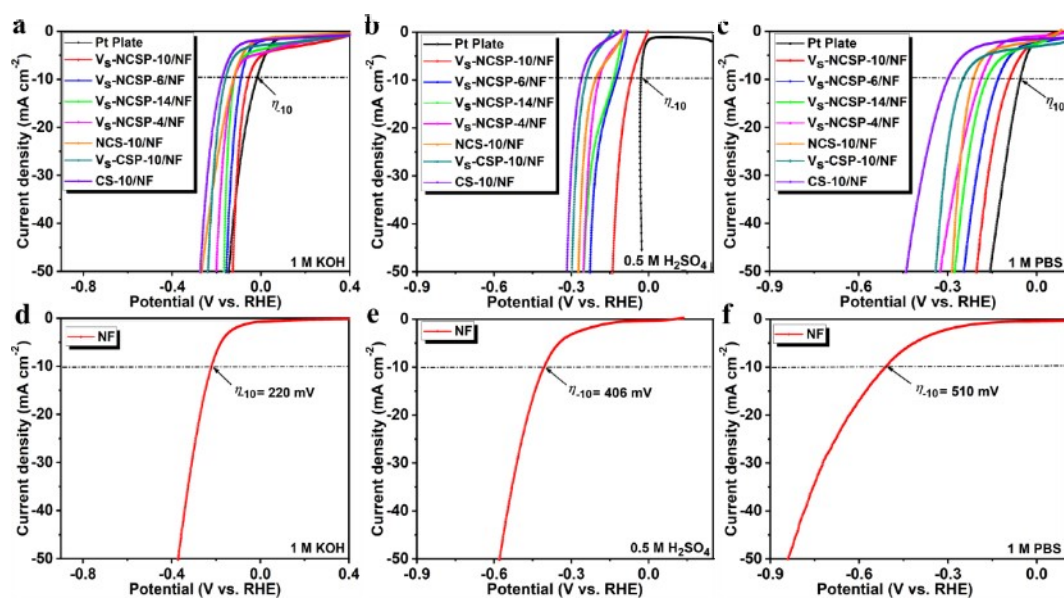

**Fig. S12.** The IR-corrected LSV curves of catalysts in (a) 1 M KOH, (b) 0.5 M  $\text{H}_2\text{SO}_4$ , (c) 1 M PBS. The LSV curves of NF in (d) 1 M KOH, (e) 0.5 M  $\text{H}_2\text{SO}_4$ , (f) 1 M PBS.

Figure S13

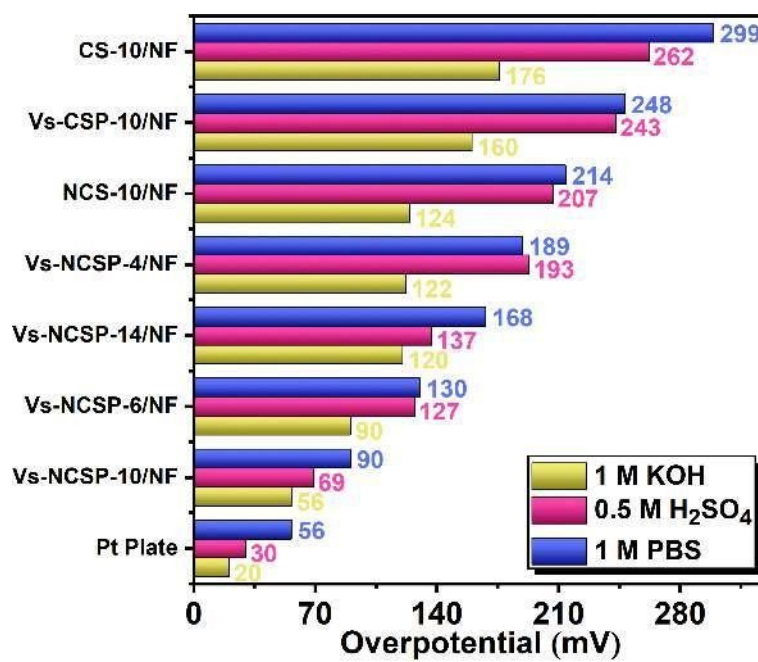

Fig. S13. The summary overpotential of this work with the different pH range at  $-10 \text{ mA cm}^{-2}$ .

Figure S14

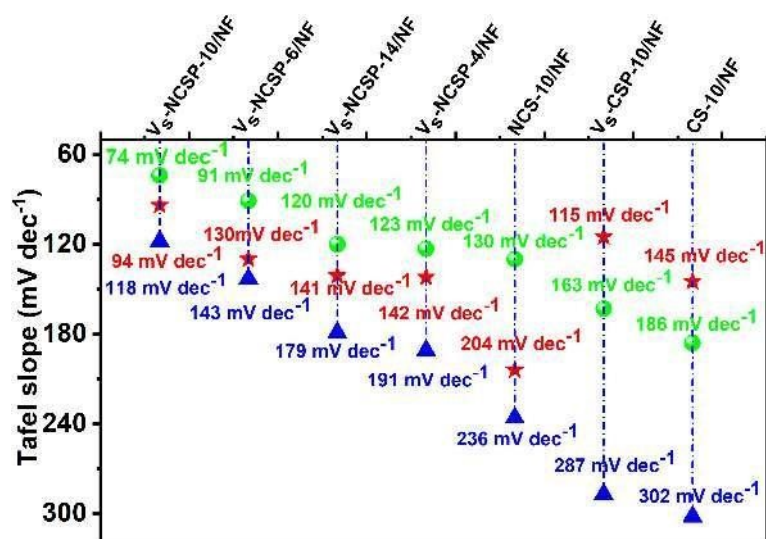

**Fig. S14.** The summary Tafel slope of this work at the different pH range. The green ball/red pentagon/blue triangle represents 1 M KOH, 0.5 M H<sub>2</sub>SO<sub>4</sub> and 1 M PBS, respectively.

Figure S15

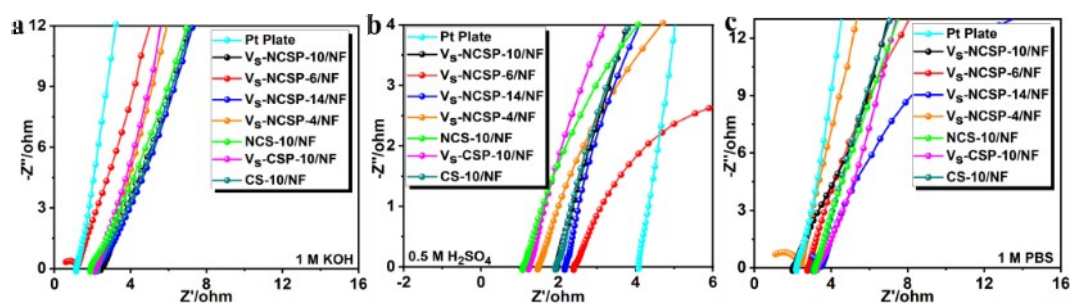

Fig. S15. EIS curves of catalysts in (a) 1 M KOH, (b) 0.5 M  $\text{H}_2\text{SO}_4$ , (c) 1 M PBS.

**Figure S16**

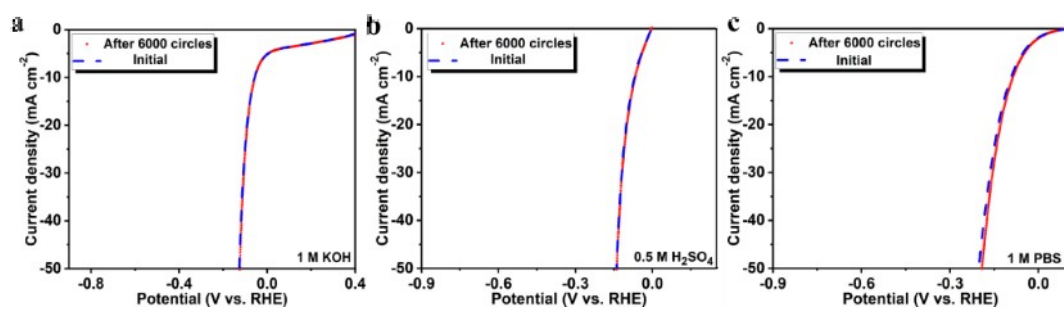

**Fig. S16.** The IR-corrected LSV curves of V<sub>s</sub>-NCSP-10/NF at the initial stage and after 6000 circles with (a) 1 M KOH, (b) 0.5 M H<sub>2</sub>SO<sub>4</sub>, (c) 1 M PBS.

Figure S17

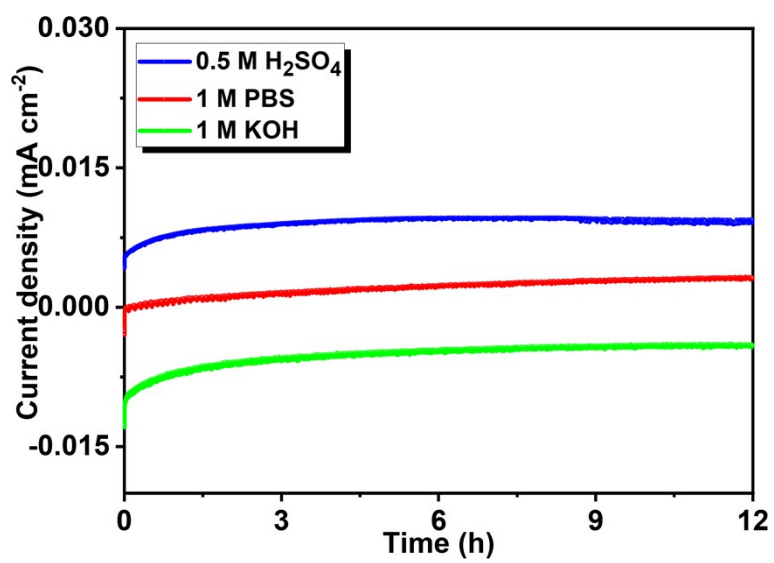

Fig. S17. Amperometric I-t curves measure of the V<sub>s</sub>-NCSP-10/NF with the different pH range for HER.

**Figure S18**

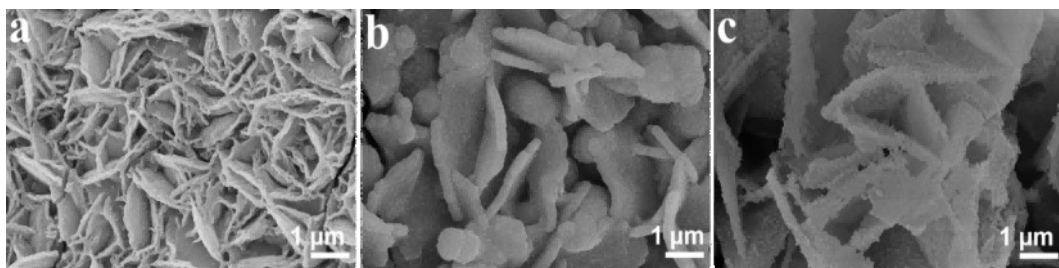

**Fig. S18.** The SEM images of  $V_s$ -NCSP-10/NF sample after HER process in (a) 1 M KOH, (b) 0.5 M  $H_2SO_4$ , (c) 1 M PBS.



Figure S19

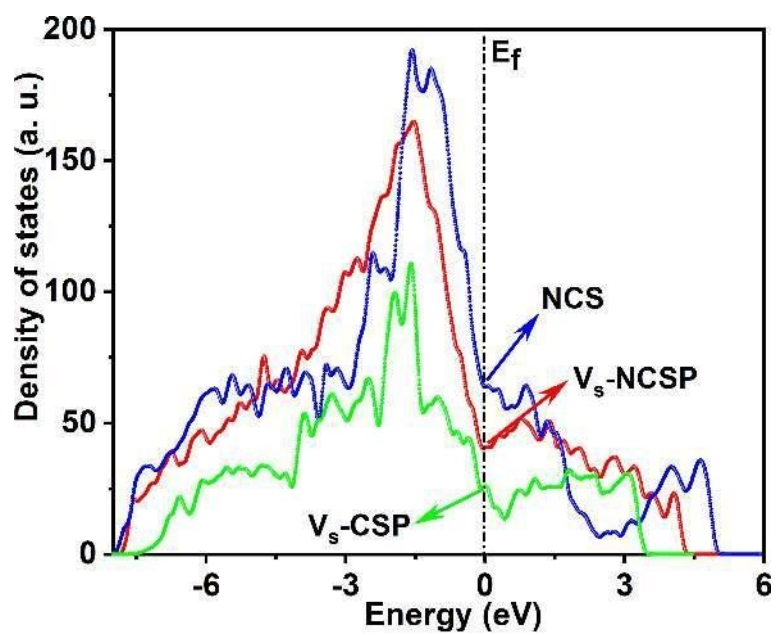

**Fig. S19.** Calculated density of states of NCS,  $V_s$ -NCSP and  $V_s$ -CSP. The black line denotes as the position of the Fermi energy level.

Figure S20

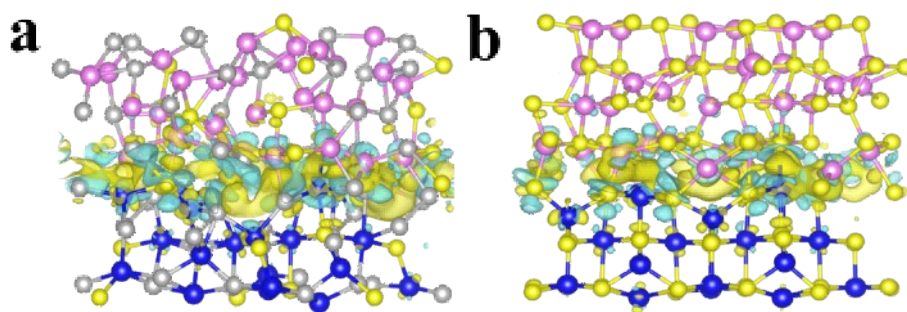

**Fig. S20.** Optimized charge density difference geometry of (a) V<sub>s</sub>-NCSP, (b) NCS. The blue, pink, yellow and grey balls represent Co, Ni, S and P atoms, respectively.

Figure S21

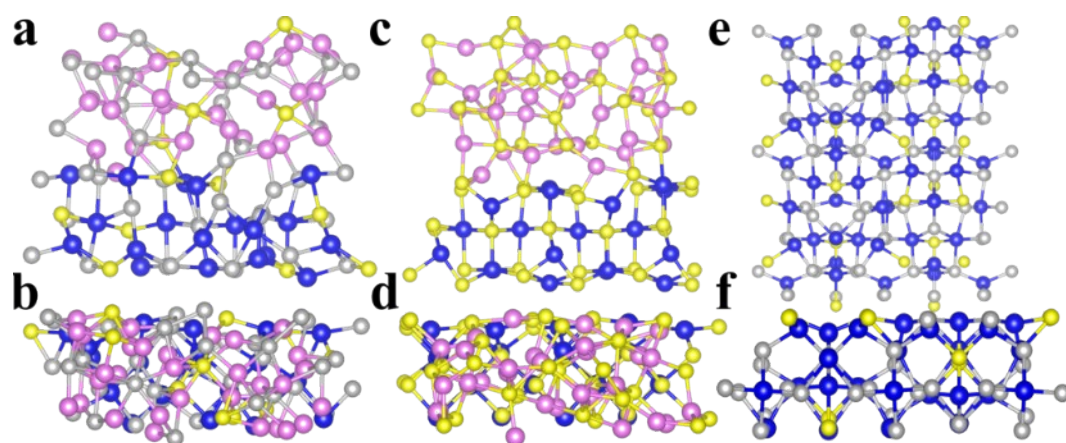

**Fig. S21.** The surface structure of different catalysts on various direction's view: (a, b)  $V_s$ -NCSP, (c, d) NCS, (e, f)  $V_s$ -CSP. The blue, pink, yellow and grey balls represent Co, Ni, S and P atoms, respectively.

Figure S22

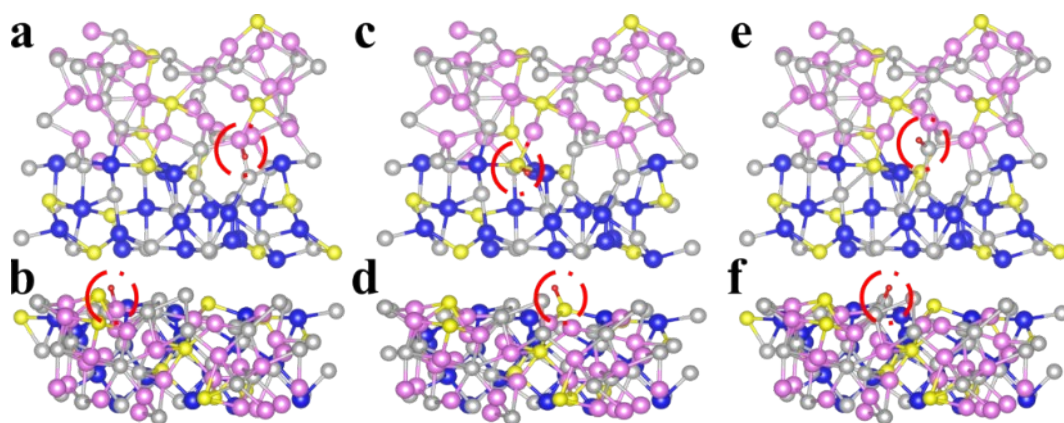

**Fig. S22.** The surface structure of hydrogen adsorption on different sites: (a, b) Ni site, (c, d) S site, (e, f) P site of  $V_5$ -NCSP. The blue, pink, yellow, grey and red balls represent Co, Ni, S, P and H atoms, respectively.

Figure S23

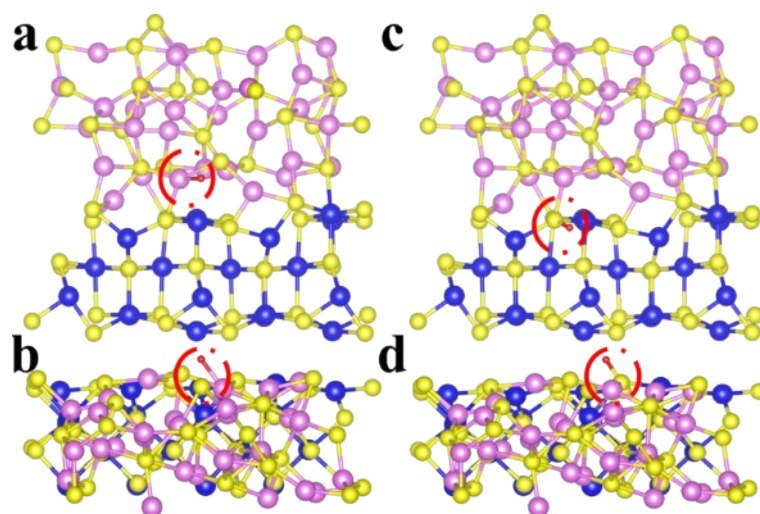

**Fig. S23.** The surface structure of hydrogen adsorption on different sites: (a, b) Ni site, (c, d) S site of NCS.

The blue, pink, yellow and red balls represent Co, Ni, S and H atoms, respectively.

Figure S24

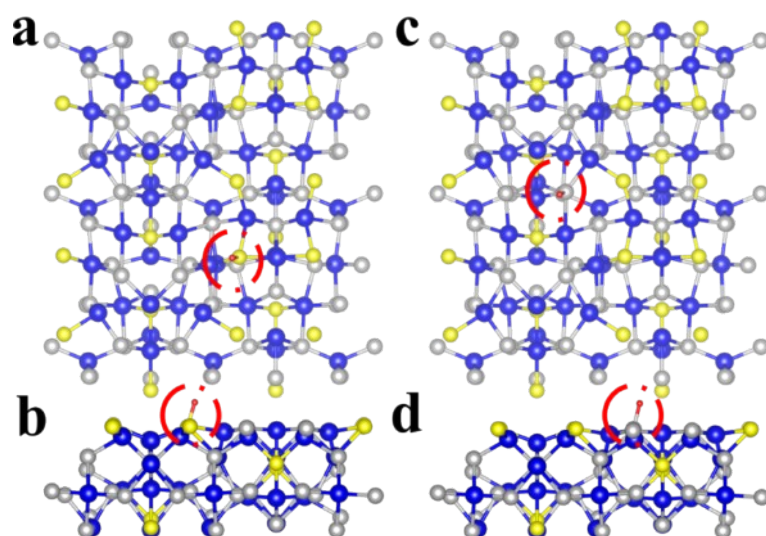

**Fig. S24.** The surface structure of hydrogen adsorption on different sites: (a, b) S site, (c, d) P site of V<sub>s</sub>-CSP.

The blue, yellow, grey and red balls represent Co, S, P and H atoms, respectively.

Figure S25

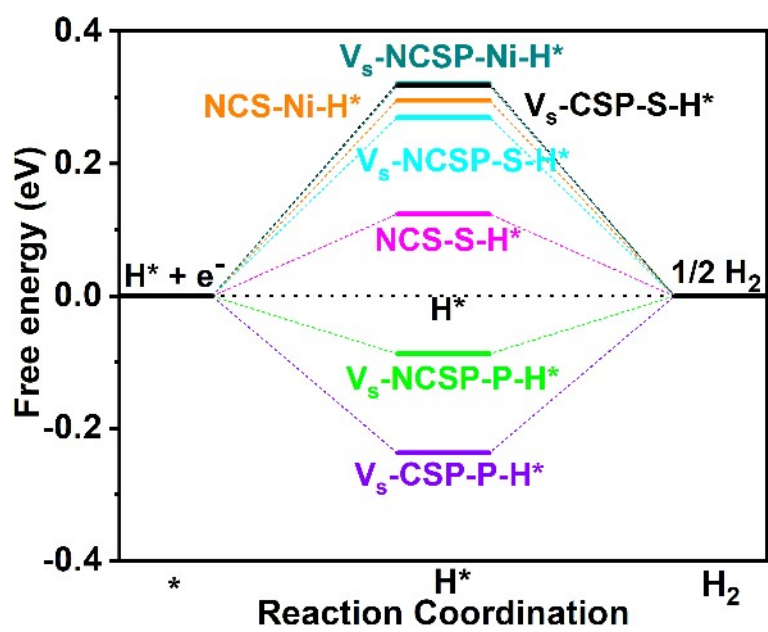

Fig. S25. Gibbs free energy ( $\Delta G_{H^*}$ ) on Ni/S/P sites of  $V_s\text{-NCSP}$ , NCS and  $V_s\text{-CSP}$ .

## 6. Supporting tables

**Table S1.** The content of S and P atomic originated from XPS characterization.

| Catalysts                 | S Atomic % | P Atomic % |
|---------------------------|------------|------------|
| V <sub>s</sub> -NCSP-X/NF | 2.28       | 7.05       |
| V <sub>s</sub> -CSP-X/NF  | 1.78       | 5.86       |



**Table S2.** The survey of HER activity for catalysts in this work. (The Ni-foam has no iR-Correction)

| Catalysts                  | Media                                            |                                  |                                                  |                                  |                                                  |                                  |
|----------------------------|--------------------------------------------------|----------------------------------|--------------------------------------------------|----------------------------------|--------------------------------------------------|----------------------------------|
|                            | 1 M KOH                                          |                                  | 0.5 M H <sub>2</sub> SO <sub>4</sub>             |                                  | 1 M PBS                                          |                                  |
|                            | Overpotential<br>-10 mA cm <sup>-2</sup><br>(mV) | Tafel<br>(mV dec <sup>-1</sup> ) | Overpotential<br>-10 mA cm <sup>-2</sup><br>(mV) | Tafel<br>(mV dec <sup>-1</sup> ) | Overpotential<br>-10 mA cm <sup>-2</sup><br>(mV) | Tafel<br>(mV dec <sup>-1</sup> ) |
| Pt plate                   | 20                                               | N/A                              | 30                                               | N/A                              | 56                                               | N/A                              |
| Ni-foam                    | 220                                              | N/A                              | 406                                              | N/A                              | 510                                              | N/A                              |
| V <sub>s</sub> -NCSP-4/NF  | 122                                              | 123                              | 193                                              | 142                              | 189                                              | 191                              |
| V <sub>s</sub> -NCSP-6/NF  | 90                                               | 91                               | 127                                              | 130                              | 130                                              | 143                              |
| V <sub>s</sub> -NCSP-10/NF | 56                                               | 74                               | 69                                               | 94                               | 90                                               | 118                              |
| V <sub>s</sub> -NCSP-14/NF | 120                                              | 120                              | 137                                              | 141                              | 168                                              | 179                              |
| NCS-10/NF                  | 124                                              | 130                              | 207                                              | 204                              | 214                                              | 236                              |
| V <sub>s</sub> -CSP-10/NF  | 160                                              | 163                              | 243                                              | 115                              | 248                                              | 287                              |
| CS-10/NF                   | 176                                              | 186                              | 262                                              | 145                              | 299                                              | 302                              |

**Table S3.** Comparison of HER activity for catalysts in this work and other reported electrocatalysts at -10 mA cm<sup>-2</sup>.

| Catalysts                                                      | Media              |                                      |         | Ref. |
|----------------------------------------------------------------|--------------------|--------------------------------------|---------|------|
|                                                                | 1 M KOH            | 0.5 M H <sub>2</sub> SO <sub>4</sub> | 1 M PBS |      |
|                                                                | Overpotential (mV) |                                      |         |      |
| This Work                                                      | 56                 | 69                                   | 90      | /    |
| MoS <sub>2</sub> /Ni <sub>3</sub> S <sub>2</sub>               | 89                 | N/A                                  | N/A     | 4    |
| Co-TiO <sub>2</sub> @Ti                                        | 78                 | N/A                                  | N/A     | 5    |
| CoMoNiS-NF                                                     | 113                | 103                                  | 117     | 6    |
| Ni <sub>3</sub> S <sub>2</sub> /NF                             | 189                | N/A                                  | N/A     | 7    |
| NiCo <sub>2</sub> S <sub>4</sub> /NF                           | 260                | N/A                                  | N/A     | 8    |
| NiCo <sub>2</sub> S <sub>4</sub> /NF                           | 137                | N/A                                  | N/A     | 9    |
| Co <sub>9</sub> S <sub>8</sub> /Ni <sub>3</sub> S <sub>2</sub> | 128                | N/A                                  | N/A     | 10   |
| N-doped Ni <sub>3</sub> S <sub>2</sub>                         | 155                | N/A                                  | N/A     | 11   |
| Ni <sub>3</sub> S <sub>2</sub>                                 | 182                | N/A                                  | N/A     | 12   |
| NiCo <sub>2</sub> S <sub>4</sub>                               | 248                | N/A                                  | N/A     | 13   |
| V-doped CoP/CC                                                 | 71                 | N/A                                  | 123     | 14   |
| Mn-CoP/Ti mesh                                                 | 76                 | N/A                                  | 192     | 15   |
| Mo-CoP/N-C                                                     | 83                 | N/A                                  | 130     | 16   |
| CoP/FeP                                                        | 67.2               | N/A                                  | 76.5    | 17   |
| Ni-P/Ni/NF                                                     | 129                | 83                                   | 112     | 18   |
| CoSAs-MoS <sub>2</sub> /TiN                                    | 131.9              | 187.5                                | 203.4   | 19   |
| Ni-doped CoP                                                   | N/A                | 144                                  | N/A     | 20   |
| Mn-doped CoP                                                   | N/A                | 178                                  | N/A     | 20   |
| Fe-doped CoP                                                   | N/A                | 198                                  | N/A     | 20   |
| Zn <sub>0.3</sub> Co <sub>2.7</sub> S <sub>4</sub>             | N/A                | 80                                   | N/A     | 21   |
| Co@N-CNTs@rGO                                                  | N/A                | 87                                   | N/A     | 22   |
| CoPS/N-C                                                       | N/A                | 80                                   | N/A     | 23   |
| FeP <sub>2</sub> -NiP <sub>2</sub> @P-C                        | N/A                | 117                                  | N/A     | 24   |
| Fe/Co/Ni based P                                               | N/A                | 138                                  | N/A     | 25   |
| Ni <sub>2</sub> P <sub>4</sub> O <sub>12</sub>                 | N/A                | 131.8                                | N/A     | 26   |
| V-doped CoP/NF                                                 | N/A                | 73                                   | N/A     | 27   |
| Fe-Co <sub>9</sub> S <sub>8</sub> /CC                          | N/A                | 65                                   | 192     | 28   |
| Ru-Ni-BDC                                                      | N/A                | N/A                                  | 219     | 29   |

## 7. Supplementary references

- 1 J. Greeley, T.F. Jaramillo, J. Bonde, I.B. Chorkendorff, J.K. Nørskov, *Nat. Mater.*, 2006, **5**, 909-913.
- 2 Y. Hou, M. Qiu, T. Zhang, X. Zhuang, C.S. Kim, C. Yuan, X. Feng, *Adv. Mater.*, 2017, **29**, 1701589.
- 3 Q. Zhou, Z. Shen, C. Zhu, J. Li, Z. Ding, P. Wang, F. Pan, Z. Zhang, H. Ma, S. Wang, H. Zhang, *Adv. Mater.*, 2018, **30**, 1800140.
- 4 L. Zhang, Y. Zheng, J. Wang, Y. Geng, B. Zhang, J. He, J. Xue, T. Frauenheim, M. Li, *Small*, 2021, **17**, 2006730.
- 5 R. Li, B. Hu, T. Yu, Z. Shao, Y. Wang, S. Song, *Small Methods*, 2021, **5**, 2100246.
- 6 Y. Yang, H. Yao, Z. Yu, S. M. Islam, H. He, M. Yuan, Y. Yue, K. Xu, W. Hao, G. Sun, H. Li, S. Ma, P. Zapol, M. G. Kanatzidis, *J. Am. Chem. Soc.*, 2019, **141**, 10417.
- 7 L. Li, C. Sun, B. Shang, Q. Li, J. Lei, N. Li, F. Pan, *J. Mater. Chem. A.*, 2019, **7**, 18003-18011.
- 8 A. Sivanantham, P. Ganesan, S. Shanmugam, *Adv. Funct. Mater.*, 2016, **26**, 4661-4672.
- 9 H. Liu, X. Ma, Y. Rao, Y. Liu, J. Liu, L. Wang, M. Wu, *ACS Appl. Mater. Interfaces.*, 2018, **10**, 10890-10897.
- 10 F. Du, L. Shi, Y. Zhang, T. Li, J. Wang, G. Wen, A. Alsaedi, T. Hayat, Y. Zhou, Z. Zou, *Appl. Catal. B.*, 2019, **253**, 246-252.
- 11 T. Kou, T. Smart, B. Yao, I. Chen, D. Thota, Y. Ping, Y. Li, *Adv. Energy Mater.*, 2018, **8**, 1703538.
- 12 T. Zhu, L. Zhu, J. Wang, G.W. Ho, *J. Mater. Chem. A.*, 2016, **4**, 13916-13922.
- 13 J. Liu, J. Wang, B. Zhang, Y. Ruan, L. Lv, X. Ji, K. Xu, L. Miao, J. Jiang, *ACS Appl. Mater. Interfaces*, 2017, **9**, 15364-15372.
- 14 X. Xiao, L. Tao, M. Li, X. Lv, D. Huang, X. Jiang, H. Pan, M. Wang, Y. Shen, *Chem. Sci.*, 2018, **9**, 1970-1975.
- 15 K. Ao, D. Li, Y. Yao, P. Lv, Y. Cai, Q. Wei, *Electrochim. Acta*, 2018, **264**, 157-165.
- 16 Y. Li, B. Zhang, W. Wang, X. Shi, J. Zhang, R. Wang, B. He, Q. Wang, J. Jiang, Y. Gong, H. Wang, *Chem. Eng. J.*, 2021, **405**, 126981.
- 17 Y. Wu, Y. Wang, Z. Wang, X. Li, *J. Mater. Chem. A.*, 2021, **9**, 23574-23581.
- 18 J. Zhang, Z. Zhang, Y. Ji, J. Yang, K. Fan, X. Ma, C. Wang, R. Shu, Y. Chen, *Appl. Catal. B.*, 2021, **282**, 119609.
- 19 T.L.L. Doan, D.C. Nguyen, S. Prabhakaran, D.H. Kim, D.T. Tran, N.H. Kim, J.H. Lee, *Adv. Funct. Mater.*, 2021, **31**, 2100233.
- 20 Y. Pan, K. Sun, Y. Lin, X. Cao, Y. Cheng, S. Liu, L. Zeng, W.-C. Cheong, D. Zhao, K. Wu, Z. Liu, Y. Liu, D. Wang, Q. Peng, C. Chen, Y. Li, *Nano Energy*, 2019, **56**, 411-419.
- 21 Z.F. Huang, J. Song, K. Li, M. Tahir, Y.T. Wang, L. Pan, L. Wang, X. Zhang, J.J. Zou, *J. Am. Chem. Soc.*, 2016, **138**, 1359-1365.
- 22 Z. Chen, R. Wu, Y. Liu, Y. Ha, Y. Guo, D. Sun, M. Liu, F. Fang, *Adv. Mater.*, 2018, **30**, 1802011.
- 23 Y. Li, S. Niu, D. Rakov, Y. Wang, M. Caban-Acevedo, S. Zheng, B. Song, P. Xu, *Nanoscale*, 2018, **10**, 7291-7297.
- 24 P. Ji, H. Jin, H. Xia, X. Luo, J. Zhu, Z. Pu, S. Mu, *ACS Appl. Mater. Interfaces*, 2020, **12**, 727-733.
- 25 Z. Pu, C. Zhang, I.S. Amiinu, W. Li, L. Wu, S. Mu, *ACS Appl. Mater. Interfaces*, 2017, **9**, 16187-16193.
- 26 X. Liu, B. Wen, R. Guo, J. Meng, Z. Liu, W. Yang, C. Niu, Q. Li, L. Mai, *Nanoscale*, 2018, **10**, 9856-9861.
- 27 H. Xue, A. Meng, H. Zhang, Y. Lin, Z. Li, C. Wang, *Nano Res.*, 2021, **14**, 4173-4181.
- 28 T. Liu, X. Ma, D. Liu, S. Hao, G. Du, Y. Ma, A.M. Asiri, X. Sun, L. Chen, *ACS Catal.*, 2016, **7**, 98-102.
- 29 Y. Sun, Z. Xue, Q. Liu, Y. Jia, Y. Li, K. Liu, Y. Lin, M. Liu, G. Li, C.Y. Su, *Nat. Commun.*, 2021, **12**, 1369.
